# Supplementary material for: Glyoxylic Acid, an α-Keto Acid Metabolite Derived from Glycine, Promotes Myogenesis in C2C12 Cells
Source: MDPI journal article supplement (doi:10.3390/nu15071763), 2023-04-04
Supplement: s1 [file s1]

Table S1: Primers used for quantitative real-time polymerase chain reaction (qRT-PCR)

| Name<br>(organism)         | Sequence (5'-3')<br>(F, forward; R, reverse)              | GeneBank<br>No. | Product size<br>(bp) |
|----------------------------|-----------------------------------------------------------|-----------------|----------------------|
| <i>Myh1</i><br>(mouse)     | F: AAAGGCAGGCTCTCTCACTGG<br>R: CCTCGATTTCGCTCCTTTTCAG     | NM_030679.2     | 123                  |
| <i>Myh2</i><br>(mouse)     | F: TGAGGAGGCTGAGGAACAATC<br>R: AGCATCGGGACAGCCTTACT       | NM_001039545.2  | 178                  |
| <i>Myh4</i><br>(mouse)     | F: CTTCGTAAGCACGAGCGCA<br>R: TTGGATTGTTTCCTCAGCCTCCT      | NM_010855.3     | 152                  |
| <i>Pax7</i><br>(mouse)     | F: TGAGTTCGATTAGCCGAGTGC<br>R: CCTCATCCAGACGGTTCCT        | NM_011039.2     | 147                  |
| <i>Myod1</i><br>(mouse)    | F: ATGGTGTCCCTGGTTCTTCAC<br>R: GACTTCTGCTCTTCCCTTCCC      | NM_010866.2     | 105                  |
| <i>Myog</i><br>(mouse)     | F: CCCAACCCAGGAGATCATTTG<br>R: CAGTTGGGCATGGTTTCGTC       | NM_031189.2     | 134                  |
| <i>Actb</i><br>(mouse)     | F: CATCCGTAAAGACCTCTATGCCAAC<br>R: ATGGAGCCACCGATCCACA    | NM_007393.5     | 171                  |
| <i>16S</i><br>(mouse)      | F: CCGCAAGGGAAAGATGAAAGAC<br>R: TCGTTTGTTTCGGGGTTTC       | NC_005089.1     | 133                  |
| <i>Actb</i><br>(mouse)     | F: CATCCGTAAAGACCTCTATGCCAAC<br>R: ATGGAGCCACCGATCCACA    | NC_000071.7     | 296                  |
| <i>Cs</i><br>(mouse)       | F: CCATGTTCAAGCTGGTGGCT<br>R: TCCGTCATGCCATAGTACTGGAG     | NM_026444.4     | 133                  |
| <i>Sirt1</i><br>(mouse)    | F: GGTA GTTCCTCGGTGCCCTA<br>R: ACCAAAGAAGACAATCTCTGGCT    | NM_019812.3     | 76                   |
| <i>Ppargc1a</i><br>(mouse) | F: ACCACAAACGATGACCCTCC<br>R: GTTGGTTTGGCTTGAGCATGT       | NM_008904.2     | 125                  |
| <i>Nrf1</i><br>(mouse)     | F: TCTCACCTCCAAACCCAAC<br>R: GCGGCAGCTCTGAATTAACC         | NM_001361693.1  | 156                  |
| <i>Nfe2l2</i><br>(mouse)   | F: CTCCCAGGTTGCCACATTC<br>R: TATCCAGGGCAAGCGACTCA         | NM_010902.4     | 113                  |
| <i>Tfam</i><br>(mouse)     | F: CCGTATTGCGTGAGACGAAC<br>R: GACAAGACTGATAGACGAGGGGA     | NM_009360.4     | 164                  |
| <i>Tfb1m</i><br>(mouse)    | F: TACGCCCTTGATAGAGCCCAA<br>R: AACATTCCAAGCCCTCGGTG       | NM_146074.3     | 111                  |
| <i>Trim63</i><br>(mouse)   | F: CTGAGTAACTGCATCTCCATGCT<br>R: CTGGTGGCTATTCTCCTTGGT    | NM_001369245.1  | 105                  |
| <i>Fbxo32</i><br>(mouse)   | F: GTCTTTTGGCAGTGAGCCCT<br>R: TATCACCACCCCTTGCCTTAC       | NM_026346.3     | 134                  |
| <i>Trim63</i><br>(Rat)     | F: CAGTACCGAGAGCAGTTGGAA<br>R: GCACTCAAGAGGAAGGTGGC       | NM_080903.2     | 95                   |
| <i>Fbxo32</i><br>(Rat)     | F: ACATGTGGGTGTATCGAATGG<br>R: AGCCTCTGCATGATGTTTCAGT     | NM_133521.2     | 139                  |
| <i>Actb</i><br>(Rat)       | F: GGAGATTACTGCCCTGGCTCCTA<br>R: GACTCATCGTACTCCTGCTTGCTG | NM_031144.3     | 150                  |

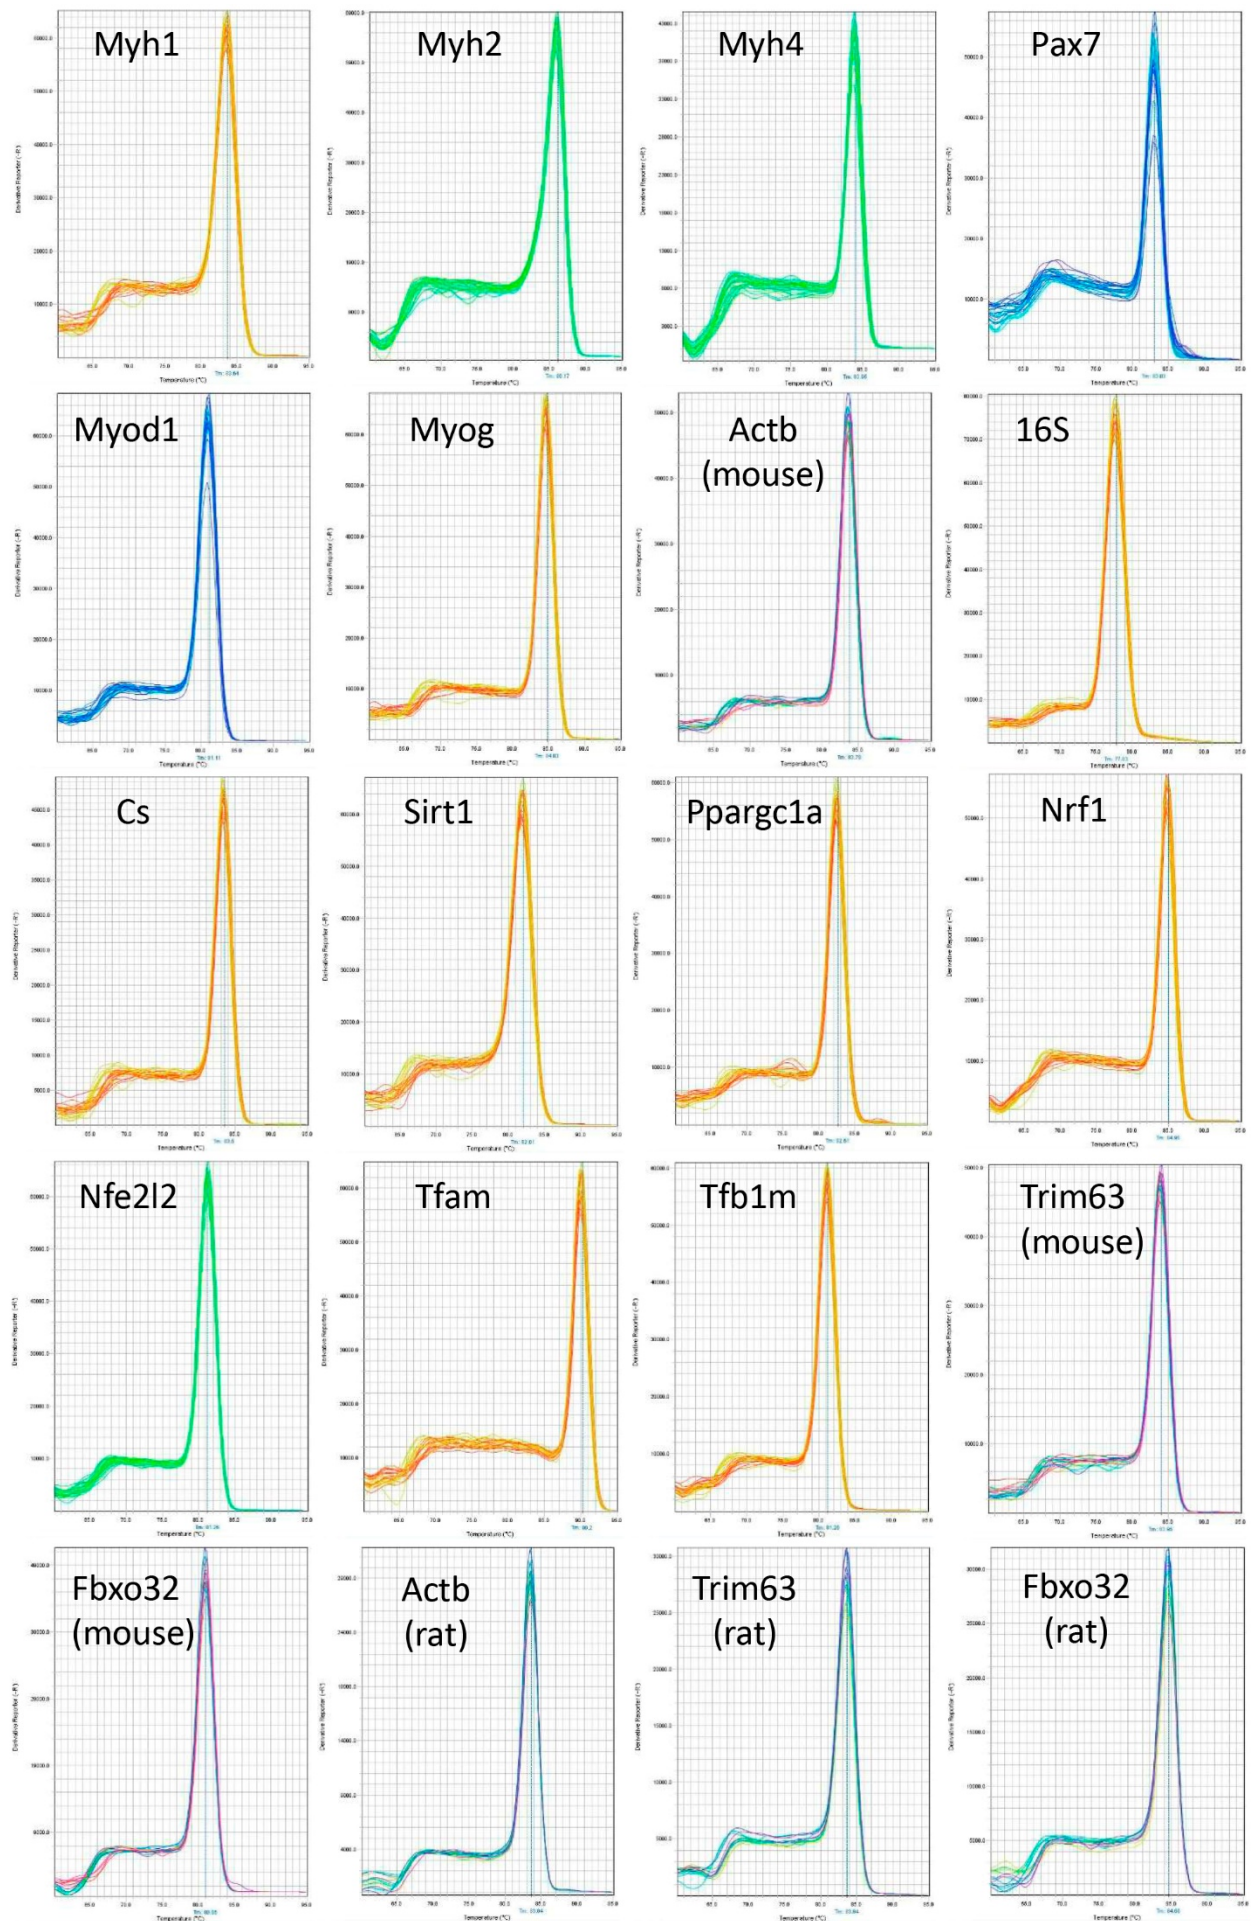

Figure S1 Melt curve analysis of quantitative real-time polymerase chain reaction products by SYBR Green assay
